# Supplementary material for: Oxidative removal of quinclorac by permanganate through a rate-limiting [3 + 2] cycloaddition reaction
Source: Royal Society of Chemistry journal article supplement (doi:10.1039/c8em00024g), 2018-01-01
Supplement: c8em00024g1.pdf [file c8em00024g1.pdf]

## **Oxidative removal of quinclorac by permanganate through a rate-limiting [3+2] cycloaddition reaction**

Dean Song,<sup>a,b</sup> Hanyang Cheng,<sup>c</sup> Xiaohua Jiang,<sup>a</sup> Huiqing Sun,<sup>a</sup> Fanyu Kong,<sup>\*,a</sup>

Rongning Liang,<sup>\*,b</sup> Zhimin Qiang,<sup>c</sup> Huijuan Liu,<sup>c</sup> and Jiuhui Qu<sup>c</sup>

<sup>a</sup> *The State Agriculture Ministry Laboratory of Quality & Safety Risk Assessment  
for Tobacco, Tobacco Research Institute, Chinese Academy of Agricultural Sciences,  
Qingdao 266101, China*

<sup>b</sup> *Key Laboratory of Coastal Environmental Processes and Ecological  
Remediation, Yantai Institute of Coastal Zone Research, Chinese Academy of  
Sciences, Yantai 264003, China*

<sup>c</sup> *Key Laboratory of Drinking Water Science and Technology, Research Center  
for Eco-Environmental Sciences, Chinese Academy of Sciences, Beijing 100085,  
China*

E-mail: [rnliang@yic.ac.cn](mailto:rnliang@yic.ac.cn)

Fig. S1. The representative kinetics of QCR oxidation by permanganate in aqueous solution by using a 200 mL glass beaker in a water bath ( $[\text{QCR}]_0 = 0.1 \text{ mM}$ ,  $[\text{MnO}_4^-] = 0.02 \text{ M}$ ,  $\text{pH} = 8.0$ ,  $T = 25 \text{ }^\circ\text{C}$ ).

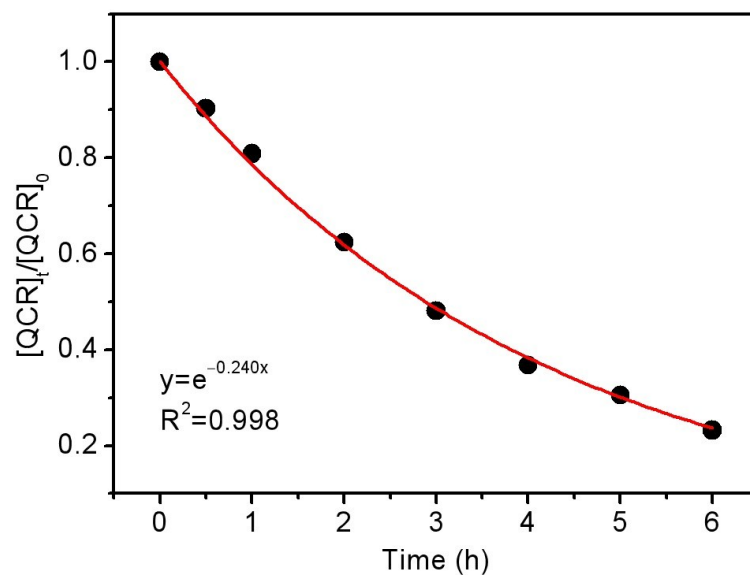

Fig. S2. The plot of  $\log(k_p)$  as a function of  $\log([\text{MnO}_4^-])$  (pH = 8.0, T = 25 °C).

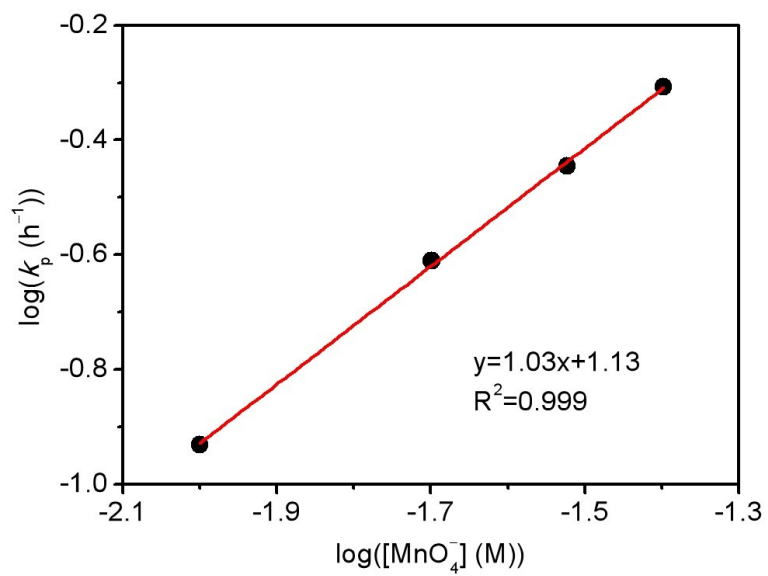

Fig. S3. The change of total organic carbon (TOC) in the QCR oxidation by permanganate in aqueous solution ( $[QCR]_0 = 0.1 \text{ mM}$ ,  $[MnO_4^-] = 0.02 \text{ M}$ ,  $\text{pH} = 8.0$ ,  $T = 25 \text{ }^\circ\text{C}$ ).

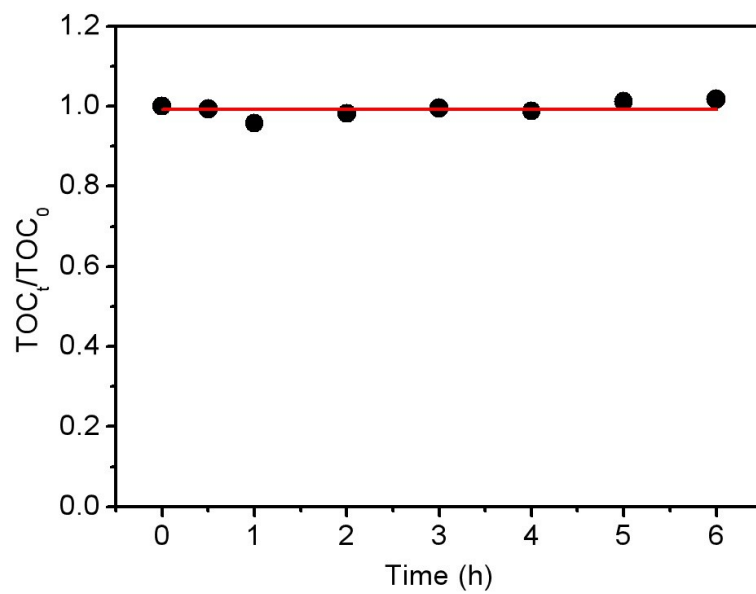

Fig. S4. Proposed degradation pathway of QCR during  $\text{MnO}_4^-$  oxidation process.

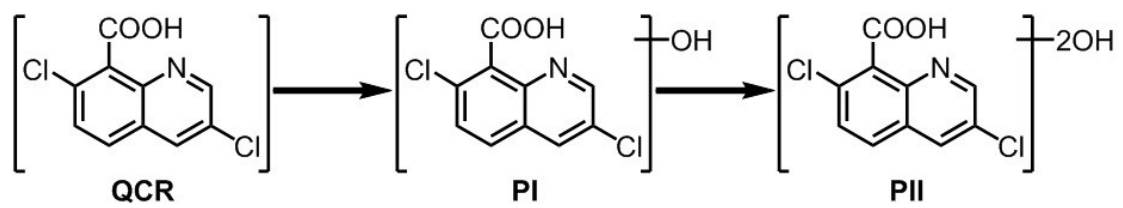

Fig. S5. Relationship between the computational L(C-O) (Å) and the experimental  $pK_a$  data of the hydroxyl group for the training set phenolates in water.

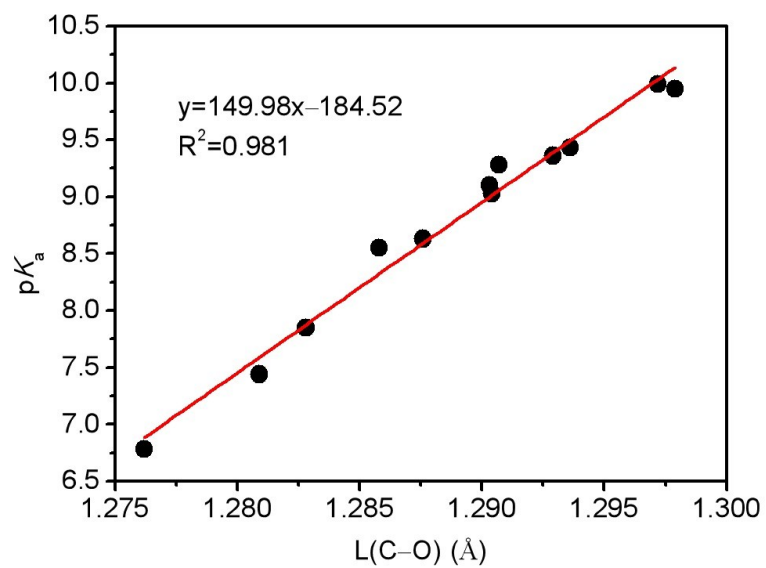

Table S1 – The computational L(C–C) (Å) for the anionic form PI and PII in water and the corresponding  $pK_a$  value of carboxylic group calculated by the established model ( $pK_a = 209.25 - 134.91 \times L(C-C)$ ) in our previous study.

| Compound         | L(C–C) (Å) | $pK_a$ |
|------------------|------------|--------|
| PI1 <sub>A</sub> | 1.5345     | 2.23   |
| PI2 <sub>A</sub> | 1.5332     | 2.41   |
| PI3 <sub>A</sub> | 1.5331     | 2.42   |
| PII <sub>A</sub> | 1.5349     | 2.18   |

Table S2 – The computational L(C–O) (Å) and the corresponding pK<sub>a</sub> value of hydroxyl group for the studied phenolates in water.

|                          | Compound               | L(C–O) (Å)          | pK <sub>a</sub> |
|--------------------------|------------------------|---------------------|-----------------|
|                          | Phenolate              | 1.2972              | 9.99            |
|                          | 3-Fluoro-phenolate     | 1.2907              | 9.28            |
|                          | 4-Fluoro-phenolate     | 1.2979              | 9.95            |
|                          | 3-Bromo-phenolate      | 1.2904              | 9.03            |
|                          | 4-Bromo-phenolate      | 1.2929              | 9.36            |
| Training set             | 2-Chloro-phenolate     | 1.2858              | 8.55            |
| a                        | 3-Chloro-phenolate     | 1.2903              | 9.10            |
|                          | 4-Chloro-phenolate     | 1.2936              | 9.43            |
|                          | 2,3-Dichloro-phenolate | 1.2809              | 7.44            |
|                          | 2,4-Dichloro-phenolate | 1.2828              | 7.85            |
|                          | 2,6-Dichloro-phenolate | 1.2762              | 6.78            |
|                          | 3,4-Dichloro-phenolate | 1.2876              | 8.63            |
|                          | PI <sub>D</sub>        | 1.2826              | 7.84            |
| Testing Set <sup>b</sup> | PII <sub>D</sub>       | 1.2913              | 9.15            |
|                          | PII <sub>T</sub>       | 1.3001 <sup>c</sup> | 10.47           |

a pK<sub>a</sub> values were taken from the references S1 and S2.

b pK<sub>a</sub> values were calculated by the regression equation in Fig. S5.

c The value was the (C<sub>5</sub>–O) bond length.

(S1) Gross, K. C.; Seybold, P. G. Substituent effects on the physical properties and pK<sub>a</sub> of phenol. *Int. J. Quantum Chem.* **2001**, *85*, 569-579.

(S2) Du, J. S.; Sun, B.; Zhang, J.; Guan, X. H. Parabola-like shaped pH-rate profile for phenols oxidation by aqueous permanganate. *Environ. Sci. Technol.* **2012**, *46*, 8860-8867.



Table S3 – The predicted 96h *Fathead Minnow* 50% lethal concentration (LC50-96h, mg L<sup>-1</sup>) and 48h *Daphnia Magna* 50% lethal concentration (LC50-48h, mg L<sup>-1</sup>) of QCR, PI, and PII.

| Compound | <i>Fathead Minnow</i><br>(LC50-96h, mg L <sup>-1</sup> ) | <i>Daphnia Magna</i><br>(LC50-48h, mg L <sup>-1</sup> ) |
|----------|----------------------------------------------------------|---------------------------------------------------------|
| QCR      | 4.43                                                     | 11.52                                                   |
| PI       | 6.43                                                     | 10.41                                                   |
| PII      | 5.19                                                     | 11.32                                                   |

The following section gives the Cartesian coordinates of optimized structures, including  $\text{MnO}_4^-$ ,  $\text{QCR}_A$ , TS11, TS12, TS13, TS14, P12, P13, P14,  $\text{PI1}_A$ ,  $\text{PI2}_A$ ,  $\text{PI3}_A$ ,  $\text{PI1}_D$ ,  $\text{PI2}_D$ ,  $\text{PI3}_D$ , TS211, TS212, TS213, TS221, TS222, TS223, TS231, TS232, TS233, TS241, TS242, TS243, TS251, TS252, TS253, TS261, TS262, TS263,  $\text{PII}_A$ ,  $\text{PII}_D$ ,  $\text{PII}_T$ , 2-chloro-benzoate, phenolate, 3-fluoro-phenolate, 4-fluoro-phenolate, 3-bromo-phenolate, 4-bromo-phenolate, 2-chloro-phenolate, 3-chloro-phenolate, 4-chloro-phenolate, 2,3-dichloro-phenolate, 2,4-dichloro-phenolate, 2,6-dichloro-phenolate, 3,4-dichloro-phenolate.

| $\text{MnO}_4^-$ | Cartesian coordinates |           |           |
|------------------|-----------------------|-----------|-----------|
| Atom             | x                     | y         | z         |
| Mn               | 0                     | 0         | 0         |
| O                | 0.921033              | 0.921033  | 0.921033  |
| O                | -0.921033             | -0.921033 | 0.921033  |
| O                | -0.921033             | 0.921033  | -0.921033 |
| O                | 0.921033              | -0.921033 | -0.921033 |

| QCR <sub>A</sub> | Cartesian coordinates |           |           |
|------------------|-----------------------|-----------|-----------|
| Atom             | x                     | y         | z         |
| Cl               | -4.654002             | -0.055162 | 0.000099  |
| C                | -2.897904             | -0.035147 | -0.000159 |
| C                | -2.199855             | -1.269759 | -0.000518 |
| N                | -0.884889             | -1.345492 | -0.000566 |
| C                | -0.153741             | -0.189837 | -0.000267 |
| C                | -0.783107             | 1.096505  | 0.000029  |
| C                | -2.200848             | 1.147446  | 0.00012   |
| C                | 0.018737              | 2.268443  | 0.000221  |
| C                | 1.39046               | 2.164321  | 0.000132  |
| C                | 1.995697              | 0.884412  | -0.000108 |
| C                | 1.2739                | -0.292388 | -0.000306 |
| C                | 1.939962              | -1.672607 | 0.000299  |
| O                | 2.183742              | -2.167344 | -1.131558 |
| O                | 2.182807              | -2.16608  | 1.132945  |
| Cl               | 3.764301              | 0.836366  | -0.000347 |
| H                | -2.757834             | -2.203212 | -0.00081  |
| H                | -2.711496             | 2.105175  | 0.000393  |
| H                | -0.45801              | 3.243714  | 0.000506  |
| H                | 2.014275              | 3.051342  | 0.000341  |

| TS11 | Cartesian coordinates |           |           |
|------|-----------------------|-----------|-----------|
| Atom | x                     | y         | z         |
| Cl   | -5.388794             | -1.316688 | -0.122915 |
| C    | -3.786888             | -0.606758 | -0.020364 |
| C    | -3.485871             | 0.518428  | -0.852584 |
| N    | -2.322667             | 1.114864  | -0.849991 |
| C    | -1.322442             | 0.644383  | -0.016142 |
| C    | -1.555415             | -0.485424 | 0.861826  |
| C    | -2.840075             | -1.101546 | 0.832804  |
| C    | -0.548876             | -0.895621 | 1.748535  |
| C    | 0.709281              | -0.312199 | 1.709883  |
| C    | 0.993976              | 0.756108  | 0.757441  |
| C    | -0.100986             | 1.324096  | -0.000483 |
| C    | 0.060437              | 2.625423  | -0.788372 |
| O    | -0.302666             | 3.667341  | -0.176652 |
| O    | 0.527956              | 2.546678  | -1.953919 |
| Cl   | 2.182735              | 1.958291  | 1.425013  |
| H    | -4.252878             | 0.904592  | -1.521216 |
| H    | -3.047522             | -1.948325 | 1.47965   |
| H    | -0.756107             | -1.674293 | 2.476374  |
| H    | 1.425258              | -0.501146 | 2.496677  |
| Mn   | 2.611935              | -1.436814 | -0.553824 |
| O    | 4.196279              | -1.427417 | -0.360849 |
| O    | 2.098207              | -2.180722 | -1.864595 |
| O    | 1.895835              | -2.029741 | 0.781291  |
| O    | 2.003852              | 0.127223  | -0.508634 |

| TS12 | Cartesian coordinates |           |           |
|------|-----------------------|-----------|-----------|
| Atom | x                     | y         | z         |
| Cl   | 4.76367               | -1.900606 | -0.122274 |
| C    | 3.349355              | -0.859062 | -0.10749  |
| C    | 3.382455              | 0.337991  | 0.630847  |
| N    | 2.355921              | 1.177295  | 0.670075  |
| C    | 1.225704              | 0.872345  | -0.016577 |
| C    | 1.102642              | -0.334746 | -0.758964 |
| C    | 2.206744              | -1.204857 | -0.804883 |
| C    | -0.141878             | -0.655751 | -1.423749 |
| C    | -1.184511             | 0.308341  | -1.432111 |
| C    | -0.971078             | 1.552394  | -0.747058 |
| C    | 0.146016              | 1.843022  | -0.017337 |
| C    | 0.330402              | 3.157716  | 0.747186  |
| O    | 0.847332              | 4.108492  | 0.102409  |
| O    | -0.056579             | 3.155214  | 1.94616   |
| Cl   | -2.278078             | 2.736041  | -0.881353 |
| H    | 4.272565              | 0.608759  | 1.193447  |
| H    | 2.151875              | -2.129589 | -1.369926 |
| H    | -0.113397             | -1.385722 | -2.223384 |
| H    | -1.922916             | 0.276289  | -2.221781 |
| Mn   | -2.24314              | -1.929584 | 0.461305  |
| O    | -3.23158              | -3.081343 | -0.035562 |
| O    | -2.129757             | -1.777756 | 2.045812  |
| O    | -0.750889             | -2.119998 | -0.203645 |
| O    | -2.644933             | -0.494352 | -0.225053 |

| TS13 | Cartesian coordinates |           |           |
|------|-----------------------|-----------|-----------|
| Atom | x                     | y         | z         |
| Cl   | 2.876763              | 2.370443  | -1.054067 |
| C    | 1.499372              | 1.423468  | -0.497687 |
| C    | 0.628122              | 2.030347  | 0.476611  |
| N    | -0.589522             | 1.633444  | 0.706065  |
| C    | -1.127504             | 0.62511   | -0.086078 |
| C    | -0.389291             | 0.021132  | -1.13746  |
| C    | 1.001382              | 0.393073  | -1.331831 |
| C    | -1.014307             | -0.924018 | -1.973677 |
| C    | -2.333105             | -1.288538 | -1.755296 |
| C    | -3.040064             | -0.700727 | -0.692743 |
| C    | -2.480157             | 0.252612  | 0.148936  |
| C    | -3.271546             | 0.903217  | 1.28891   |
| O    | -3.924199             | 1.939048  | 0.990768  |
| O    | -3.200319             | 0.329654  | 2.408445  |
| Cl   | -4.718053             | -1.213917 | -0.452676 |
| H    | 1.019807              | 2.852232  | 1.073014  |
| H    | 1.428476              | 0.267052  | -2.318954 |
| H    | -0.452725             | -1.376941 | -2.78516  |
| H    | -2.818886             | -2.021153 | -2.39049  |
| Mn   | 2.774112              | -1.188521 | 0.612967  |
| O    | 2.108647              | -2.141404 | 1.700882  |
| O    | 4.317619              | -1.466655 | 0.330538  |
| O    | 1.915467              | -1.2298   | -0.795294 |
| O    | 2.540499              | 0.379497  | 1.006095  |

| TS14 | Cartesian coordinates |           |           |
|------|-----------------------|-----------|-----------|
| Atom | x                     | y         | z         |
| Cl   | 2.927405              | 2.252882  | 1.146038  |
| C    | 1.510995              | 1.377092  | 0.572183  |
| C    | 1.063448              | 0.234994  | 1.372523  |
| N    | -0.260585             | -0.145892 | 1.321713  |
| C    | -1.063197             | 0.378527  | 0.400406  |
| C    | -0.665279             | 1.489999  | -0.453354 |
| C    | 0.610933              | 2.022765  | -0.279302 |
| C    | -1.602606             | 2.039673  | -1.383371 |
| C    | -2.867799             | 1.529235  | -1.47542  |
| C    | -3.252279             | 0.44595   | -0.623974 |
| C    | -2.419353             | -0.130848 | 0.297496  |
| C    | -2.854022             | -1.280396 | 1.21117   |
| O    | -3.3656               | -0.946534 | 2.313646  |
| O    | -2.664871             | -2.445255 | 0.76925   |
| Cl   | -4.912241             | -0.140485 | -0.810782 |
| H    | 1.497882              | 0.170469  | 2.367714  |
| H    | 0.916285              | 2.914432  | -0.817659 |
| H    | -1.294353             | 2.865772  | -2.017529 |
| H    | -3.586287             | 1.933622  | -2.179649 |
| Mn   | 2.76043               | -1.171855 | -0.64588  |
| O    | 2.057615              | -2.139276 | -1.693084 |
| O    | 4.308879              | -1.447531 | -0.396949 |
| O    | 2.520472              | 0.388962  | -1.051042 |
| O    | 1.92563               | -1.175289 | 0.809758  |

| P12  | Cartesian coordinates |           |           |
|------|-----------------------|-----------|-----------|
| Atom | x                     | y         | z         |
| Cl   | 4.952301              | -1.925341 | -0.026942 |
| C    | 3.520355              | -0.909033 | -0.034987 |
| C    | 3.608863              | 0.420616  | 0.376923  |
| N    | 2.551618              | 1.238826  | 0.37464   |
| C    | 1.357681              | 0.766129  | -0.031867 |
| C    | 1.185266              | -0.572085 | -0.444724 |
| C    | 2.29025               | -1.419074 | -0.448017 |
| C    | -0.189094             | -1.096259 | -0.783853 |
| C    | -1.186944             | -0.031995 | -1.264388 |
| C    | -0.939484             | 1.31314   | -0.608233 |
| C    | 0.222214              | 1.710723  | -0.05914  |
| C    | 0.449964              | 3.115559  | 0.515768  |
| O    | 0.829072              | 3.997526  | -0.299725 |
| O    | 0.2367                | 3.245047  | 1.751162  |
| Cl   | -2.296959             | 2.438935  | -0.731947 |
| H    | 4.556263              | 0.834146  | 0.712805  |
| H    | 2.193685              | -2.453762 | -0.76222  |
| H    | -0.106232             | -1.867039 | -1.563712 |
| H    | -1.109641             | 0.107247  | -2.35478  |
| Mn   | -2.547583             | -1.673121 | 0.423151  |
| O    | -3.107905             | -3.08767  | -0.023071 |
| O    | -3.077959             | -0.917399 | 1.711375  |
| O    | -0.739586             | -1.693927 | 0.396021  |
| O    | -2.485454             | -0.541297 | -0.990403 |



| P13  | Cartesian coordinates |           |           |
|------|-----------------------|-----------|-----------|
| Atom | x                     | y         | z         |
| Cl   | 2.762765              | 2.34819   | -1.082298 |
| C    | 1.572711              | 1.137634  | -0.072436 |
| C    | 0.49026               | 2.070178  | 0.428041  |
| N    | -0.758358             | 1.795564  | 0.406921  |
| C    | -1.202483             | 0.556661  | -0.119722 |
| C    | -0.333117             | -0.344861 | -0.763692 |
| C    | 1.108236              | 0.058062  | -1.052961 |
| C    | -0.822972             | -1.569622 | -1.216951 |
| C    | -2.166962             | -1.90347  | -1.038061 |
| C    | -3.016635             | -0.989958 | -0.414585 |
| C    | -2.570111             | 0.249004  | 0.054373  |
| C    | -3.513529             | 1.246748  | 0.736212  |
| O    | -4.088873             | 2.068055  | -0.027012 |
| O    | -3.629952             | 1.137621  | 1.98563   |
| Cl   | -4.718253             | -1.442093 | -0.22242  |
| H    | 0.81928               | 3.002597  | 0.88528   |
| H    | 1.145113              | 0.438134  | -2.081921 |
| H    | -0.152247             | -2.267564 | -1.706788 |
| H    | -2.549497             | -2.857808 | -1.383841 |
| Mn   | 2.974444              | -1.072849 | 0.56889   |
| O    | 2.389525              | -2.145479 | 1.566811  |
| O    | 4.51386               | -0.940644 | 0.251769  |
| O    | 2.006889              | -1.035422 | -0.957196 |
| O    | 2.265511              | 0.599746  | 0.949429  |

| P14  | Cartesian coordinates |           |           |
|------|-----------------------|-----------|-----------|
| Atom | x                     | y         | z         |
| Cl   | 2.677978              | 2.327125  | 1.169946  |
| C    | 1.556362              | 1.075638  | 0.067067  |
| C    | 1.115175              | -0.03236  | 1.039111  |
| N    | -0.227584             | -0.545998 | 0.816849  |
| C    | -1.121964             | 0.205043  | 0.257338  |
| C    | -0.828529             | 1.548599  | -0.330695 |
| C    | 0.460835              | 1.954396  | -0.42805  |
| C    | -1.924713             | 2.336702  | -0.864449 |
| C    | -3.184573             | 1.843043  | -0.882106 |
| C    | -3.448633             | 0.512003  | -0.368564 |
| C    | -2.504174             | -0.298949 | 0.171248  |
| C    | -2.80568              | -1.694345 | 0.725835  |
| O    | -3.139036             | -1.748137 | 1.93917   |
| O    | -2.694519             | -2.647125 | -0.090538 |
| Cl   | -5.129678             | -0.021622 | -0.477618 |
| H    | 1.11905               | 0.343612  | 2.071774  |
| H    | 0.736775              | 2.864375  | -0.951502 |
| H    | -1.708977             | 3.32565   | -1.257182 |
| H    | -4.010065             | 2.421776  | -1.281447 |
| Mn   | 3.089841              | -1.047158 | -0.538814 |
| O    | 2.6                   | -2.12766  | -1.577958 |
| O    | 4.605721              | -0.850031 | -0.152125 |
| O    | 2.322276              | 0.598151  | -0.927285 |
| O    | 2.056125              | -1.081029 | 0.943832  |

| PI1 <sub>A</sub> | Cartesian coordinates |           |           |
|------------------|-----------------------|-----------|-----------|
|                  | x                     | y         | z         |
| Cl               | -4.795884             | 0.175272  | -0.000249 |
| C                | -3.04459              | 0.033296  | -0.00019  |
| C                | -2.465868             | -1.261971 | -0.000254 |
| N                | -1.162705             | -1.454207 | -0.000197 |
| C                | -0.332423             | -0.370349 | -0.000075 |
| C                | -0.835139             | 0.97073   | -0.000023 |
| C                | -2.244714             | 1.148356  | -0.00008  |
| C                | 0.06137               | 2.064941  | 0.000084  |
| C                | 1.422653              | 1.842349  | 0.00014   |
| C                | 1.911683              | 0.502189  | 0.000101  |
| C                | 1.079677              | -0.596113 | 0         |
| C                | 1.622287              | -2.03144  | 0.00007   |
| O                | 1.819903              | -2.542535 | -1.132633 |
| O                | 1.819489              | -2.542551 | 1.132837  |
| Cl               | 3.667795              | 0.2961    | 0.000198  |
| H                | -3.106764             | -2.14015  | -0.000357 |
| H                | -2.667502             | 2.147616  | -0.000035 |
| H                | -0.31195              | 3.083726  | 0.000127  |
| O                | 2.25699               | 2.915564  | 0.000244  |
| H                | 3.182007              | 2.619179  | 0.000303  |

| PI2 <sub>A</sub> | Cartesian coordinates |           |           |
|------------------|-----------------------|-----------|-----------|
| Atom             | x                     | y         | z         |
| Cl               | -4.608138             | -0.405867 | -0.000264 |
| C                | -2.853331             | -0.337511 | -0.000171 |
| C                | -2.119819             | -1.549327 | -0.000157 |
| N                | -0.802783             | -1.5861   | -0.000085 |
| C                | -0.10052              | -0.413003 | -0.000021 |
| C                | -0.774735             | 0.850032  | -0.000036 |
| C                | -2.190213             | 0.865421  | -0.000113 |
| C                | -0.00164              | 2.048531  | 0.00003   |
| C                | 1.374709              | 1.982197  | 0.000113  |
| C                | 2.008296              | 0.716731  | 0.000127  |
| C                | 1.327697              | -0.481828 | 0.000063  |
| C                | 2.031504              | -1.84392  | 0.000088  |
| O                | 2.289387              | -2.33419  | -1.131531 |
| O                | 2.289195              | -2.334243 | 1.131727  |
| Cl               | 3.776772              | 0.727948  | 0.000238  |
| H                | -2.648655             | -2.499651 | -0.000206 |
| H                | -2.724507             | 1.807957  | -0.000124 |
| H                | 1.974058              | 2.88664   | 0.000169  |
| O                | -0.699276             | 3.222243  | 0.000006  |
| H                | -0.094334             | 3.977967  | 0.000034  |

| PI3 <sub>A</sub> | Cartesian coordinates |           |           |
|------------------|-----------------------|-----------|-----------|
| Atom             | x                     | y         | z         |
| Cl               | -4.445811             | -0.535963 | 0.000124  |
| C                | -2.694986             | -0.405729 | -0.00027  |
| C                | -1.898204             | -1.571094 | -0.000458 |
| N                | -0.580738             | -1.552938 | -0.000392 |
| C                | 0.050231              | -0.337935 | -0.000129 |
| C                | -0.667885             | 0.898127  | -0.000075 |
| C                | -2.093468             | 0.840821  | 0.000246  |
| C                | 0.035723              | 2.128796  | -0.00031  |
| C                | 1.412553              | 2.131072  | -0.000337 |
| C                | 2.112636              | 0.902954  | -0.000081 |
| C                | 1.481395              | -0.32522  | -0.000027 |
| C                | 2.252795              | -1.650105 | 0.000182  |
| O                | 2.535081              | -2.123642 | -1.131955 |
| O                | 2.534723              | -2.12348  | 1.132479  |
| Cl               | 3.880244              | 0.9882    | 0.000098  |
| H                | -2.388547             | -2.541997 | -0.000799 |
| H                | -0.513924             | 3.0626    | -0.00064  |
| H                | 1.964394              | 3.064506  | -0.000556 |
| O                | -2.769701             | 2.007528  | 0.000514  |
| H                | -3.727659             | 1.844063  | 0.000219  |

| PI1 <sub>D</sub> | Cartesian coordinates |           |           |
|------------------|-----------------------|-----------|-----------|
|                  | x                     | y         | z         |
| Cl               | -4.784065             | 0.13399   | -0.000278 |
| C                | -3.021138             | 0.009575  | -0.000186 |
| C                | -2.433647             | -1.278133 | -0.000205 |
| N                | -1.120788             | -1.442314 | -0.000134 |
| C                | -0.308161             | -0.351971 | -0.000037 |
| C                | -0.820893             | 0.994379  | -0.000023 |
| C                | -2.239853             | 1.138411  | -0.0001   |
| C                | 0.055235              | 2.093763  | 0.000065  |
| C                | 1.466847              | 1.953878  | 0.000146  |
| C                | 1.926805              | 0.560106  | 0.000141  |
| C                | 1.113289              | -0.547959 | 0.000054  |
| C                | 1.665202              | -1.977501 | 0.000035  |
| O                | 1.867424              | -2.499917 | -1.130651 |
| O                | 1.867031              | -2.500108 | 1.130701  |
| Cl               | 3.689653              | 0.333352  | 0.000262  |
| H                | -3.059086             | -2.167125 | -0.000277 |
| H                | -2.683817             | 2.129138  | -0.000089 |
| H                | -0.351147             | 3.102502  | 0.000071  |
| O                | 2.280851              | 2.939971  | 0.00022   |

| PI2 <sub>D</sub> | Cartesian coordinates |           |           |
|------------------|-----------------------|-----------|-----------|
| Atom             | x                     | y         | z         |
| Cl               | -4.624269             | -0.371077 | -0.00027  |
| C                | -2.858434             | -0.3144   | -0.000178 |
| C                | -2.131824             | -1.523872 | -0.000197 |
| N                | -0.811637             | -1.563704 | -0.000128 |
| C                | -0.100733             | -0.389135 | -0.000032 |
| C                | -0.775589             | 0.879867  | -0.000016 |
| C                | -2.182353             | 0.886421  | -0.000091 |
| C                | -0.036686             | 2.149731  | 0.00008   |
| C                | 1.375835              | 2.017346  | 0.000161  |
| C                | 1.986202              | 0.754518  | 0.000146  |
| C                | 1.32262               | -0.462131 | 0.000053  |
| C                | 2.034714              | -1.815719 | 0.000035  |
| O                | 2.303016              | -2.31953  | -1.128525 |
| O                | 2.302736              | -2.319708 | 1.128582  |
| Cl               | 3.775847              | 0.750801  | 0.000273  |
| H                | -2.661106             | -2.47485  | -0.00027  |
| H                | -2.699615             | 1.839909  | -0.000075 |
| H                | 1.983571              | 2.916194  | 0.000236  |
| O                | -0.645842             | 3.27844   | 0.000091  |

| PI3 <sub>D</sub> | Cartesian coordinates |           |           |
|------------------|-----------------------|-----------|-----------|
| Atom             | x                     | y         | z         |
| Cl               | -4.495532             | -0.505454 | -0.000284 |
| C                | -2.729049             | -0.345988 | -0.000171 |
| C                | -1.954564             | -1.50744  | -0.000198 |
| N                | -0.623285             | -1.536079 | -0.000127 |
| C                | 0.015776              | -0.323478 | -0.000024 |
| C                | -0.684265             | 0.921777  | 0.000006  |
| C                | -2.154565             | 0.958202  | -0.000051 |
| C                | 0.043697              | 2.132987  | 0.000096  |
| C                | 1.424218              | 2.133028  | 0.00016   |
| C                | 2.101381              | 0.894948  | 0.000143  |
| C                | 1.451237              | -0.323716 | 0.000058  |
| C                | 2.210705              | -1.652919 | 0.000061  |
| O                | 2.494968              | -2.135592 | -1.13063  |
| O                | 2.494799              | -2.135669 | 1.130761  |
| Cl               | 3.880009              | 0.951586  | 0.000245  |
| H                | -2.460746             | -2.47238  | -0.000281 |
| H                | -0.508501             | 3.066794  | 0.00011   |
| H                | 1.98707               | 3.060403  | 0.000223  |
| O                | -2.807063             | 2.044896  | -0.000005 |



| TS211 | Cartesian coordinates |           |           |
|-------|-----------------------|-----------|-----------|
| Atom  | x                     | y         | z         |
| Cl    | 4.902744              | -1.627054 | -0.285665 |
| C     | 3.438361              | -0.662563 | -0.190856 |
| C     | 3.439298              | 0.517241  | 0.577015  |
| N     | 2.372991              | 1.298988  | 0.676311  |
| C     | 1.233733              | 0.949632  | 0.027623  |
| C     | 1.141029              | -0.246372 | -0.737446 |
| C     | 2.289512              | -1.0526   | -0.85215  |
| C     | -0.102793             | -0.623129 | -1.365975 |
| C     | -1.200118             | 0.279179  | -1.291414 |
| C     | -1.0251               | 1.534081  | -0.594825 |
| C     | 0.106993              | 1.861007  | 0.090328  |
| C     | 0.241222              | 3.162023  | 0.891246  |
| O     | 0.669042              | 4.161112  | 0.25568   |
| O     | -0.095544             | 3.09719   | 2.102733  |
| Cl    | -2.407819             | 2.630696  | -0.629891 |
| H     | 4.33583               | 0.82142   | 1.111431  |
| H     | 2.260855              | -1.965122 | -1.43809  |
| H     | -0.065057             | -1.268804 | -2.234862 |
| O     | -2.152964             | 0.125872  | -2.246851 |
| H     | -2.900873             | 0.716927  | -2.061309 |
| Mn    | -1.908823             | -2.107703 | 0.65599   |
| O     | -3.05701              | -3.11223  | 0.17927   |
| O     | -1.487969             | -2.23652  | 2.191493  |
| O     | -0.587218             | -2.233866 | -0.319595 |
| O     | -2.326795             | -0.561268 | 0.303781  |

| TS212 | Cartesian coordinates |           |           |
|-------|-----------------------|-----------|-----------|
| Atom  | x                     | y         | z         |
| Cl    | 3.093005              | 1.884006  | -1.72439  |
| C     | 1.686563              | 1.243452  | -0.877519 |
| C     | 0.896792              | 2.171773  | -0.107989 |
| N     | -0.327302             | 1.937051  | 0.265514  |
| C     | -0.949477             | 0.772771  | -0.164888 |
| C     | -0.29972              | -0.165106 | -1.01047  |
| C     | 1.097108              | 0.047608  | -1.353992 |
| C     | -1.000997             | -1.276803 | -1.503354 |
| C     | -2.32582              | -1.484812 | -1.143196 |
| C     | -2.95483              | -0.55967  | -0.278049 |
| C     | -2.302716             | 0.562249  | 0.212458  |
| C     | -3.011452             | 1.562369  | 1.134581  |
| O     | -3.62552              | 2.501445  | 0.563234  |
| O     | -2.917007             | 1.333349  | 2.369315  |
| Cl    | -4.638819             | -0.883539 | 0.157659  |
| H     | 1.358542              | 3.107354  | 0.201337  |
| H     | 1.467962              | -0.388219 | -2.273269 |
| H     | -0.512819             | -1.99485  | -2.154267 |
| O     | -2.963543             | -2.581243 | -1.63782  |
| H     | -3.875489             | -2.611783 | -1.305455 |
| Mn    | 2.856269              | -1.014568 | 0.925938  |
| O     | 4.370899              | -1.464524 | 0.715755  |
| O     | 2.170386              | -1.562582 | 2.25453   |
| O     | 2.727641              | 0.611933  | 0.84451   |
| O     | 1.951185              | -1.408203 | -0.39533  |

| TS213 | Cartesian coordinates |           |           |
|-------|-----------------------|-----------|-----------|
| Atom  | x                     | y         | z         |
| Cl    | 3.095178              | 2.115985  | 1.379511  |
| C     | 1.62906               | 1.311039  | 0.83927   |
| C     | 1.327652              | 0.00458   | 1.432807  |
| N     | 0.030993              | -0.470745 | 1.352811  |
| C     | -0.863113             | 0.164176  | 0.602043  |
| C     | -0.614915             | 1.460626  | -0.01089  |
| C     | 0.642888              | 2.042453  | 0.195297  |
| C     | -1.641712             | 2.114142  | -0.743768 |
| C     | -2.875665             | 1.529968  | -0.885338 |
| C     | -3.121287             | 0.249077  | -0.276268 |
| C     | -2.17986              | -0.429205 | 0.448622  |
| C     | -2.469396             | -1.790384 | 1.0909    |
| O     | -2.939327             | -1.759127 | 2.258577  |
| O     | -2.21807              | -2.799162 | 0.380716  |
| Cl    | -4.737244             | -0.431849 | -0.508132 |
| H     | 1.787018              | -0.168631 | 2.405412  |
| H     | 0.854085              | 3.041893  | -0.171248 |
| H     | -1.453991             | 3.080534  | -1.200908 |
| O     | -3.836416             | 2.178174  | -1.597334 |
| H     | -4.652077             | 1.651066  | -1.612367 |
| Mn    | 2.909437              | -0.981274 | -0.888821 |
| O     | 4.498502              | -1.104199 | -0.878062 |
| O     | 2.16073               | -1.949521 | -1.904879 |
| O     | 2.285154              | -1.17783  | 0.666259  |
| O     | 2.477589              | 0.568298  | -1.13022  |

| TS221 | Cartesian coordinates |           |           |
|-------|-----------------------|-----------|-----------|
| Atom  | x                     | y         | z         |
| Cl    | -4.882568             | -1.715648 | -0.114303 |
| C     | -3.432889             | -0.726951 | -0.053562 |
| C     | -3.418467             | 0.515908  | -0.711322 |
| N     | -2.360444             | 1.316531  | -0.694555 |
| C     | -1.246659             | 0.929732  | -0.02474  |
| C     | -1.179609             | -0.326209 | 0.638133  |
| C     | -2.308067             | -1.162192 | 0.623199  |
| C     | 0.05753               | -0.725175 | 1.277066  |
| C     | 1.120468              | 0.213696  | 1.406087  |
| C     | 0.962531              | 1.488197  | 0.766726  |
| C     | -0.12927              | 1.853477  | 0.032089  |
| C     | -0.247679             | 3.206574  | -0.676945 |
| O     | -0.731999             | 4.151111  | 0.000806  |
| O     | 0.155718              | 3.23621   | -1.870103 |
| Cl    | 2.296559              | 2.623641  | 1.000451  |
| H     | -4.295034             | 0.85643   | -1.256817 |
| H     | -2.285545             | -2.122591 | 1.124271  |
| H     | 1.760879              | 0.149376  | 2.276754  |
| O     | -0.040048             | -1.773253 | 2.142763  |
| H     | 0.842457              | -2.0505   | 2.430069  |
| Mn    | 2.287067              | -1.749889 | -0.682964 |
| O     | 2.946016              | -3.154702 | -0.301551 |
| O     | 2.580528              | -1.238634 | -2.165855 |
| O     | 0.669963              | -1.788379 | -0.397122 |
| O     | 2.697134              | -0.599782 | 0.420659  |

| TS222 | Cartesian coordinates |           |           |
|-------|-----------------------|-----------|-----------|
| Atom  | x                     | y         | z         |
| Cl    | 2.886198              | 1.777766  | -1.892493 |
| C     | 1.51716               | 1.16476   | -0.967564 |
| C     | 0.659753              | 2.132203  | -0.332436 |
| N     | -0.554138             | 1.87626   | 0.058544  |
| C     | -1.112068             | 0.636607  | -0.233664 |
| C     | -0.385127             | -0.352045 | -0.948387 |
| C     | 1.003631              | -0.116539 | -1.288004 |
| C     | -1.043753             | -1.544292 | -1.329761 |
| C     | -2.365758             | -1.763094 | -0.964945 |
| C     | -3.042226             | -0.779551 | -0.226566 |
| C     | -2.46371              | 0.424238  | 0.149273  |
| C     | -3.229723             | 1.501766  | 0.92564   |
| O     | -3.882251             | 2.328833  | 0.232984  |
| O     | -3.142551             | 1.449565  | 2.182269  |
| Cl    | -4.719318             | -1.129282 | 0.215736  |
| H     | 1.060626              | 3.125789  | -0.140909 |
| H     | 1.41998               | -0.654381 | -2.128965 |
| H     | -2.871485             | -2.682242 | -1.242562 |
| O     | -0.32639              | -2.450304 | -2.059    |
| H     | -0.882863             | -3.2038   | -2.302359 |
| Mn    | 2.800139              | -0.71297  | 1.138247  |
| O     | 4.344232              | -1.082229 | 0.994326  |
| O     | 2.143744              | -1.104541 | 2.535247  |
| O     | 2.564715              | 0.872563  | 0.817368  |
| O     | 1.933904              | -1.356822 | -0.109174 |

| TS223 | Cartesian coordinates |           |           |
|-------|-----------------------|-----------|-----------|
| Atom  | x                     | y         | z         |
| Cl    | 2.972372              | 1.850881  | 1.650266  |
| C     | 1.550414              | 1.101675  | 0.932431  |
| C     | 1.151357              | -0.206085 | 1.451836  |
| N     | -0.158837             | -0.611014 | 1.320828  |
| C     | -1.001066             | 0.087495  | 0.563667  |
| C     | -0.651432             | 1.391097  | 0.013941  |
| C     | 0.609126              | 1.910385  | 0.287488  |
| C     | -1.632292             | 2.124956  | -0.737278 |
| C     | -2.883422             | 1.605439  | -0.939193 |
| C     | -3.201453             | 0.327968  | -0.383825 |
| C     | -2.335361             | -0.436805 | 0.349075  |
| C     | -2.713746             | -1.800772 | 0.934636  |
| O     | -3.232108             | -1.78783  | 2.084387  |
| O     | -2.479975             | -2.806222 | 0.210236  |
| Cl    | -4.842956             | -0.251717 | -0.702379 |
| H     | 1.603841              | -0.487182 | 2.400361  |
| H     | 0.872949              | 2.915061  | -0.020777 |
| H     | -3.630071             | 2.145346  | -1.511629 |
| O     | -1.229157             | 3.336489  | -1.221691 |
| H     | -1.953579             | 3.766904  | -1.698421 |
| Mn    | 2.806873              | -1.047893 | -0.887307 |
| O     | 4.377912              | -1.288682 | -0.792104 |
| O     | 2.076483              | -1.801137 | -2.081346 |
| O     | 2.067261              | -1.412869 | 0.573429  |
| O     | 2.481343              | 0.5498    | -0.920834 |

| TS231 | Cartesian coordinates |           |           |
|-------|-----------------------|-----------|-----------|
| Atom  | x                     | y         | z         |
| Cl    | 4.899647              | -1.09902  | 0.13732   |
| C     | 3.350876              | -0.272867 | 0.095009  |
| C     | 3.166591              | 0.928413  | 0.792486  |
| N     | 2.028197              | 1.608985  | 0.775713  |
| C     | 0.987864              | 1.108455  | 0.058305  |
| C     | 1.06207               | -0.124679 | -0.640664 |
| C     | 2.294992              | -0.819325 | -0.633496 |
| C     | -0.095329             | -0.65362  | -1.322833 |
| C     | -1.261108             | 0.154623  | -1.421887 |
| C     | -1.249993             | 1.444074  | -0.792173 |
| C     | -0.219678             | 1.911796  | -0.027992 |
| C     | -0.260911             | 3.26634   | 0.686874  |
| O     | 0.150145              | 4.258596  | 0.02857   |
| O     | -0.709282             | 3.251827  | 1.864438  |
| Cl    | -2.694118             | 2.434725  | -1.041217 |
| H     | 3.988913              | 1.339503  | 1.373317  |
| H     | 0.063674              | -1.414289 | -2.074901 |
| H     | -1.94338              | -0.010794 | -2.244576 |
| O     | 2.389272              | -1.969607 | -1.331317 |
| H     | 3.288027              | -2.332153 | -1.262349 |
| Mn    | -2.104444             | -2.098334 | 0.544624  |
| O     | -2.880363             | -3.413054 | 0.074043  |
| O     | -2.120681             | -1.832603 | 2.118651  |
| O     | -0.560316             | -2.108505 | -0.02132  |
| O     | -2.659994             | -0.780786 | -0.262142 |

| TS232 | Cartesian coordinates |           |           |
|-------|-----------------------|-----------|-----------|
| Atom  | x                     | y         | z         |
| Cl    | -2.799357             | 2.541625  | 0.315674  |
| C     | -1.480455             | 1.414247  | -0.000618 |
| C     | -0.59724              | 1.722935  | -1.097329 |
| N     | 0.625944              | 1.296144  | -1.200082 |
| C     | 1.179007              | 0.582104  | -0.142295 |
| C     | 0.455275              | 0.306854  | 1.045668  |
| C     | -0.951341             | 0.680733  | 1.112759  |
| C     | 1.092233              | -0.330324 | 2.125609  |
| C     | 2.419233              | -0.717701 | 2.018993  |
| C     | 3.115932              | -0.464842 | 0.826877  |
| C     | 2.537173              | 0.18051   | -0.25985  |
| C     | 3.319398              | 0.477185  | -1.544669 |
| O     | 3.954834              | 1.564983  | -1.565298 |
| O     | 3.260322              | -0.402099 | -2.444777 |
| Cl    | 4.802107              | -0.997326 | 0.74099   |
| H     | -0.995994             | 2.335197  | -1.903903 |
| H     | 0.538759              | -0.530554 | 3.03566   |
| H     | 2.916309              | -1.218533 | 2.842609  |
| O     | -1.458476             | 0.819373  | 2.36184   |
| H     | -2.387585             | 1.096655  | 2.319034  |
| Mn    | -2.681981             | -1.383564 | -0.498017 |
| O     | -4.153561             | -1.697747 | 0.032959  |
| O     | -2.089897             | -2.448644 | -1.523475 |
| O     | -2.608043             | 0.1321    | -1.117265 |
| O     | -1.65338              | -1.159209 | 0.766448  |



| TS233 | Cartesian coordinates |           |           |
|-------|-----------------------|-----------|-----------|
| Atom  | x                     | y         | z         |
| Cl    | 2.88918               | 1.89095   | 1.456877  |
| C     | 1.51549               | 1.046825  | 0.705232  |
| C     | 0.944742              | -0.05242  | 1.473842  |
| N     | -0.354931             | -0.393404 | 1.379485  |
| C     | -1.129604             | 0.234365  | 0.479516  |
| C     | -0.692765             | 1.395324  | -0.268623 |
| C     | 0.609953              | 1.853808  | -0.058317 |
| C     | -1.596383             | 2.064839  | -1.152785 |
| C     | -2.873956             | 1.602425  | -1.308504 |
| C     | -3.29469              | 0.455012  | -0.572488 |
| C     | -2.486786             | -0.227408 | 0.303636  |
| C     | -2.96699              | -1.453425 | 1.08728   |
| O     | -3.520842             | -1.220836 | 2.195229  |
| O     | -2.77026              | -2.571986 | 0.541835  |
| Cl    | -4.959066             | -0.079478 | -0.8421   |
| H     | 1.447715              | -0.317241 | 2.396586  |
| H     | -1.254062             | 2.932871  | -1.704616 |
| H     | -3.568472             | 2.090289  | -1.983049 |
| O     | 1.008468              | 2.997529  | -0.63651  |
| H     | 1.937062              | 3.183002  | -0.416508 |
| Mn    | 2.721568              | -1.289255 | -0.732819 |
| O     | 4.278309              | -1.566926 | -0.536623 |
| O     | 2.039305              | -2.021708 | -1.969245 |
| O     | 1.901703              | -1.613666 | 0.66163   |
| O     | 2.42545               | 0.345739  | -0.782849 |

| TS241 | Cartesian coordinates |           |           |
|-------|-----------------------|-----------|-----------|
| Atom  | x                     | y         | z         |
| Cl    | -4.928008             | -1.183902 | 0.304425  |
| C     | -3.387857             | -0.332904 | 0.214432  |
| C     | -3.287102             | 0.82241   | -0.581043 |
| N     | -2.158027             | 1.515224  | -0.676429 |
| C     | -1.059694             | 1.09729   | 0.001112  |
| C     | -1.071379             | -0.081643 | 0.806237  |
| C     | -2.28606              | -0.790655 | 0.911645  |
| C     | 0.118276              | -0.533054 | 1.481542  |
| C     | 1.314837              | 0.301336  | 1.471118  |
| C     | 1.245437              | 1.495645  | 0.610979  |
| C     | 0.141093              | 1.906262  | -0.076402 |
| C     | 0.116432              | 3.178143  | -0.930019 |
| O     | -0.226905             | 4.241348  | -0.343273 |
| O     | 0.441682              | 3.044663  | -2.14144  |
| Cl    | 2.714629              | 2.480208  | 0.568817  |
| H     | -4.147458             | 1.182745  | -1.139682 |
| H     | -2.342119             | -1.685737 | 1.522575  |
| H     | -0.018209             | -1.105918 | 2.392184  |
| O     | 2.278713              | 0.082085  | 2.251602  |
| Mn    | 1.562585              | -2.367112 | -0.635834 |
| O     | 0.766884              | -2.806956 | -1.966527 |
| O     | 2.038512              | -0.798621 | -0.755704 |
| O     | 0.512222              | -2.254805 | 0.642854  |
| O     | 2.828007              | -3.286968 | -0.243382 |

| TS242 | Cartesian coordinates |           |           |
|-------|-----------------------|-----------|-----------|
| Atom  | x                     | y         | z         |
| Cl    | 3.07618               | 1.99399   | -1.594629 |
| C     | 1.632465              | 1.328837  | -0.821715 |
| C     | 0.822302              | 2.218514  | -0.052685 |
| N     | -0.40767              | 1.931344  | 0.301661  |
| C     | -0.989709             | 0.770308  | -0.147202 |
| C     | -0.314625             | -0.138447 | -1.018594 |
| C     | 1.084573              | 0.126232  | -1.340231 |
| C     | -0.981971             | -1.240391 | -1.551756 |
| C     | -2.343762             | -1.552025 | -1.242109 |
| C     | -2.966829             | -0.613779 | -0.320511 |
| C     | -2.349837             | 0.504995  | 0.204128  |
| C     | -3.079739             | 1.470713  | 1.143095  |
| O     | -3.711924             | 2.416816  | 0.596828  |
| O     | -2.986693             | 1.229424  | 2.378701  |
| Cl    | -4.653525             | -0.964817 | 0.125408  |
| H     | 1.248614              | 3.160918  | 0.284105  |
| H     | 1.462532              | -0.244685 | -2.28547  |
| H     | -0.457603             | -1.917344 | -2.221738 |
| O     | -2.952212             | -2.56441  | -1.729356 |
| Mn    | 2.863468              | -1.052385 | 0.879376  |
| O     | 2.163349              | -1.744523 | 2.138657  |
| O     | 1.990975              | -1.337795 | -0.495575 |
| O     | 2.690127              | 0.569495  | 0.946438  |
| O     | 4.400265              | -1.438302 | 0.662969  |

| TS243 | Cartesian coordinates |           |           |
|-------|-----------------------|-----------|-----------|
| Atom  | x                     | y         | z         |
| Cl    | 3.30977               | 2.391676  | 1.099262  |
| C     | 1.758161              | 1.621417  | 0.784834  |
| C     | 1.466475              | 0.379727  | 1.504024  |
| N     | 0.164119              | -0.080683 | 1.500509  |
| C     | -0.701891             | 0.40052   | 0.613421  |
| C     | -0.407048             | 1.528541  | -0.258716 |
| C     | 0.87468               | 2.156711  | -0.090912 |
| C     | -1.357305             | 1.997417  | -1.153483 |
| C     | -2.663563             | 1.41936   | -1.274553 |
| C     | -2.932193             | 0.307511  | -0.348648 |
| C     | -2.032333             | -0.184298 | 0.555665  |
| C     | -2.373163             | -1.32117  | 1.523649  |
| O     | -2.845778             | -0.968909 | 2.638714  |
| O     | -2.156608             | -2.493408 | 1.116168  |
| Cl    | -4.552691             | -0.398616 | -0.448068 |
| H     | 1.952368              | 0.283346  | 2.473281  |
| H     | 1.106243              | 3.057053  | -0.651612 |
| H     | -1.129255             | 2.841482  | -1.799474 |
| O     | -3.525168             | 1.837164  | -2.100954 |
| Mn    | 2.383166              | -1.351591 | -0.83594  |
| O     | 1.032945              | -2.203795 | -1.026866 |
| O     | 2.441921              | -0.019134 | -1.745701 |
| O     | 2.441549              | -0.823272 | 0.77541   |
| O     | 3.696314              | -2.271615 | -1.135426 |

| TS251 | Cartesian coordinates |           |           |
|-------|-----------------------|-----------|-----------|
| Atom  | x                     | y         | z         |
| Cl    | -4.945484             | -1.530887 | -0.148315 |
| C     | -3.452257             | -0.59734  | -0.063752 |
| C     | -3.354001             | 0.607888  | -0.778641 |
| N     | -2.261297             | 1.362806  | -0.746315 |
| C     | -1.195171             | 0.9591    | -0.006976 |
| C     | -1.212514             | -0.266907 | 0.717748  |
| C     | -2.382507             | -1.038214 | 0.694637  |
| C     | -0.058545             | -0.695093 | 1.533973  |
| C     | 1.119137              | 0.164871  | 1.495575  |
| C     | 1.025018              | 1.414932  | 0.804767  |
| C     | -0.03375              | 1.823911  | 0.040173  |
| C     | -0.060264             | 3.15618   | -0.712502 |
| O     | -0.523661             | 4.148929  | -0.085862 |
| O     | 0.387409              | 3.141201  | -1.892467 |
| Cl    | 2.430524              | 2.493614  | 0.992387  |
| H     | -4.18824              | 0.959048  | -1.381446 |
| H     | -2.420413             | -1.964238 | 1.25775   |
| H     | 1.754123              | 0.120016  | 2.371752  |
| O     | -0.136963             | -1.670179 | 2.331036  |
| Mn    | 2.197318              | -1.840362 | -0.674948 |
| O     | 2.577444              | -3.364992 | -0.313251 |
| O     | 0.561165              | -1.676356 | -0.704293 |
| O     | 2.563772              | -0.838621 | 0.594826  |
| O     | 2.837599              | -1.26345  | -2.036164 |

| TS252 | Cartesian coordinates |           |           |
|-------|-----------------------|-----------|-----------|
| Atom  | x                     | y         | z         |
| Cl    | 2.810299              | 1.765458  | -1.938322 |
| C     | 1.499332              | 1.113965  | -0.922151 |
| C     | 0.631212              | 2.093661  | -0.298361 |
| N     | -0.583946             | 1.839554  | 0.08035   |
| C     | -1.154313             | 0.602777  | -0.223887 |
| C     | -0.433033             | -0.373242 | -0.975615 |
| C     | 0.925952              | -0.125144 | -1.313166 |
| C     | -1.083018             | -1.59168  | -1.445746 |
| C     | -2.436897             | -1.769638 | -1.00976  |
| C     | -3.075388             | -0.809562 | -0.236082 |
| C     | -2.495286             | 0.398051  | 0.170478  |
| C     | -3.258363             | 1.459452  | 0.965067  |
| O     | -3.927991             | 2.297892  | 0.296561  |
| O     | -3.165338             | 1.403059  | 2.224436  |
| Cl    | -4.759823             | -1.155467 | 0.245735  |
| H     | 1.039377              | 3.081914  | -0.092471 |
| H     | 1.376486              | -0.71303  | -2.100129 |
| H     | -2.955746             | -2.676656 | -1.302388 |
| O     | -0.490824             | -2.445285 | -2.190762 |
| Mn    | 2.905779              | -0.707374 | 1.112564  |
| O     | 4.466677              | -1.016672 | 0.928706  |
| O     | 2.306771              | -1.027174 | 2.560983  |
| O     | 2.575406              | 0.856406  | 0.684061  |
| O     | 2.035771              | -1.474033 | -0.050517 |

| TS253 | Cartesian coordinates |           |           |
|-------|-----------------------|-----------|-----------|
| Atom  | x                     | y         | z         |
| Cl    | 2.783608              | 1.90103   | 1.74658   |
| C     | 1.485304              | 1.035929  | 0.852687  |
| C     | 0.965098              | -0.136651 | 1.538482  |
| N     | -0.271914             | -0.570326 | 1.379844  |
| C     | -1.128929             | 0.095607  | 0.544019  |
| C     | -0.746958             | 1.373638  | -0.037887 |
| C     | 0.517497              | 1.85828   | 0.195969  |
| C     | -1.708753             | 2.17284   | -0.843946 |
| C     | -2.99026              | 1.578796  | -1.032671 |
| C     | -3.285593             | 0.341922  | -0.466825 |
| C     | -2.418841             | -0.429411 | 0.321554  |
| C     | -2.832548             | -1.773383 | 0.925228  |
| O     | -3.411352             | -1.73886  | 2.048294  |
| O     | -2.569009             | -2.805724 | 0.24515   |
| Cl    | -4.918687             | -0.293019 | -0.785971 |
| H     | 1.559664              | -0.584326 | 2.324811  |
| H     | 0.801926              | 2.832518  | -0.186539 |
| H     | -3.726384             | 2.10482   | -1.630249 |
| O     | -1.38227              | 3.297177  | -1.330758 |
| Mn    | 3.039825              | -0.980933 | -0.85276  |
| O     | 4.636843              | -1.006602 | -0.71153  |
| O     | 2.456171              | -1.581796 | -2.216392 |
| O     | 2.358453              | -1.72553  | 0.440076  |
| O     | 2.465267              | 0.576464  | -0.619585 |

| TS261 | Cartesian coordinates |           |           |
|-------|-----------------------|-----------|-----------|
| Atom  | x                     | y         | z         |
| Cl    | 4.934545              | -1.258084 | 0.14541   |
| C     | 3.379647              | -0.414133 | 0.074608  |
| C     | 3.230298              | 0.772507  | 0.779648  |
| N     | 2.114124              | 1.513031  | 0.78162   |
| C     | 1.064539              | 1.0385    | 0.058762  |
| C     | 1.096362              | -0.187688 | -0.649481 |
| C     | 2.320224              | -0.982438 | -0.71114  |
| C     | -0.080142             | -0.660597 | -1.320128 |
| C     | -1.232245             | 0.176297  | -1.420992 |
| C     | -1.168832             | 1.464277  | -0.791676 |
| C     | -0.121376             | 1.88567   | -0.025566 |
| C     | -0.121119             | 3.236863  | 0.69249   |
| O     | 0.318202              | 4.223341  | 0.040936  |
| O     | -0.573251             | 3.237953  | 1.870668  |
| Cl    | -2.577048             | 2.518052  | -1.041628 |
| H     | 4.065748              | 1.150728  | 1.367251  |
| H     | 0.051039              | -1.446484 | -2.052055 |
| H     | -1.900318             | 0.047116  | -2.262491 |
| O     | 2.424403              | -2.049013 | -1.387459 |
| Mn    | -2.218145             | -2.018236 | 0.537532  |
| O     | -3.0547               | -3.306314 | 0.078416  |
| O     | -2.244718             | -1.70781  | 2.108136  |
| O     | -0.667677             | -2.120805 | -0.000717 |
| O     | -2.682673             | -0.687563 | -0.315702 |



| TS262 | Cartesian coordinates |           |           |
|-------|-----------------------|-----------|-----------|
| Atom  | x                     | y         | z         |
| Cl    | -2.679828             | 2.745682  | -0.293564 |
| C     | -1.510916             | 1.393687  | -0.262463 |
| C     | -0.674938             | 1.307631  | -1.43331  |
| N     | 0.550063              | 0.856925  | -1.459655 |
| C     | 1.158105              | 0.52376   | -0.25624  |
| C     | 0.484901              | 0.631092  | 0.98891   |
| C     | -0.913683             | 1.107353  | 1.050287  |
| C     | 1.177128              | 0.339531  | 2.176967  |
| C     | 2.49649               | -0.087583 | 2.141158  |
| C     | 3.139681              | -0.209389 | 0.899085  |
| C     | 2.511955              | 0.089239  | -0.304468 |
| C     | 3.235045              | -0.028182 | -1.649448 |
| O     | 3.861095              | 0.995491  | -2.038826 |
| O     | 3.149014              | -1.142486 | -2.23411  |
| Cl    | 4.826845              | -0.764174 | 0.905276  |
| H     | -1.113989             | 1.618149  | -2.381054 |
| H     | 0.657523              | 0.439341  | 3.123945  |
| H     | 3.029712              | -0.327652 | 3.055094  |
| O     | -1.483082             | 1.378282  | 2.133142  |
| Mn    | -2.733294             | -1.480067 | -0.131434 |
| O     | -3.920622             | -1.802311 | 0.90716   |
| O     | -2.58959              | -2.501105 | -1.363157 |
| O     | -2.855002             | 0.077856  | -0.685823 |
| O     | -1.313468             | -1.357617 | 0.682053  |

| TS263 | Cartesian coordinates |           |           |
|-------|-----------------------|-----------|-----------|
| Atom  | x                     | y         | z         |
| Cl    | 2.963888              | 1.886227  | 1.334133  |
| C     | 1.487085              | 1.128056  | 0.706308  |
| C     | 0.873157              | 0.166033  | 1.591386  |
| N     | -0.381883             | -0.232086 | 1.487083  |
| C     | -1.161366             | 0.324536  | 0.497131  |
| C     | -0.734682             | 1.432499  | -0.293817 |
| C     | 0.604282              | 1.993261  | -0.100173 |
| C     | -1.612581             | 2.014508  | -1.231613 |
| C     | -2.885891             | 1.508261  | -1.417659 |
| C     | -3.293068             | 0.410016  | -0.633874 |
| C     | -2.483263             | -0.19071  | 0.316728  |
| C     | -2.964167             | -1.371748 | 1.164522  |
| O     | -3.557945             | -1.082889 | 2.239754  |
| O     | -2.735684             | -2.523304 | 0.702457  |
| Cl    | -4.936382             | -0.204168 | -0.90647  |
| H     | 1.437664              | -0.164959 | 2.454382  |
| H     | -1.265267             | 2.860561  | -1.815866 |
| H     | -3.561709             | 1.936451  | -2.14965  |
| O     | 0.981884              | 3.066474  | -0.611424 |
| Mn    | 2.748733              | -1.295913 | -0.715376 |
| O     | 4.349858              | -1.298421 | -0.857909 |
| O     | 1.950878              | -2.255343 | -1.724715 |
| O     | 2.330659              | -1.632297 | 0.843473  |
| O     | 2.167791              | 0.264168  | -0.826378 |

| Atom | Cartesian coordinates |           |           |
|------|-----------------------|-----------|-----------|
|      | x                     | y         | z         |
| Cl   | -4.773507             | -0.113853 | 0.000007  |
| C    | -3.020024             | -0.221848 | -0.000022 |
| C    | -2.415223             | -1.505022 | -0.000073 |
| N    | -1.109267             | -1.673702 | -0.000081 |
| C    | -0.292604             | -0.578097 | -0.000042 |
| C    | -0.832033             | 0.750616  | -0.000007 |
| C    | -2.24179              | 0.908376  | 0.000008  |
| C    | 0.048716              | 1.859144  | 0.000012  |
| C    | 1.41769               | 1.655464  | -0.000007 |
| C    | 1.927585              | 0.331761  | -0.000031 |
| C    | 1.119324              | -0.785873 | -0.000044 |
| C    | 1.690993              | -2.210339 | 0.000054  |
| O    | 1.901001              | -2.720133 | -1.131916 |
| O    | 1.900777              | -2.720031 | 1.132112  |
| Cl   | 3.686868              | 0.175083  | -0.000042 |
| H    | -3.038839             | -2.395714 | -0.000112 |
| H    | -2.678945             | 1.899802  | 0.000042  |
| O    | -0.480003             | 3.120283  | 0.000049  |
| H    | 0.243084              | 3.767322  | 0.00008   |
| O    | 2.197943              | 2.77511   | 0.000018  |
| H    | 3.138893              | 2.536662  | -0.000027 |

| P11 <sub>D</sub> | Cartesian coordinates |           |           |
|------------------|-----------------------|-----------|-----------|
|                  | x                     | y         | z         |
| Cl               | -4.765253             | -0.153944 | 0.000065  |
| C                | -3.001019             | -0.239792 | -0.000017 |
| C                | -2.385748             | -1.51863  | 0.000004  |
| N                | -1.07358              | -1.664544 | -0.00002  |
| C                | -0.269567             | -0.563127 | -0.000058 |
| C                | -0.822975             | 0.773121  | -0.000117 |
| C                | -2.242716             | 0.902226  | -0.000077 |
| C                | 0.04604               | 1.868683  | -0.000089 |
| C                | 1.457631              | 1.743411  | -0.000084 |
| C                | 1.946044              | 0.386861  | -0.000082 |
| C                | 1.145686              | -0.741817 | -0.000033 |
| C                | 1.728952              | -2.158754 | 0.000008  |
| O                | 1.945902              | -2.678237 | -1.130006 |
| O                | 1.945824              | -2.6782   | 1.13005   |
| Cl               | 3.711931              | 0.204781  | 0.000054  |
| H                | -2.9974               | -2.417518 | 0.000045  |
| H                | -2.698473             | 1.885914  | -0.00011  |
| O                | -0.435817             | 3.159085  | 0.000015  |
| H                | 0.388103              | 3.694357  | 0.00035   |
| O                | 2.183507              | 2.811318  | 0.00008   |

| PII <sub>T</sub> | Cartesian coordinates |           |           |
|------------------|-----------------------|-----------|-----------|
|                  | x                     | y         | z         |
| Cl               | -4.770093             | -0.150819 | 0.000013  |
| C                | -2.994192             | -0.237008 | -0.000007 |
| C                | -2.377276             | -1.516291 | -0.000022 |
| N                | -1.065848             | -1.659572 | -0.000033 |
| C                | -0.255171             | -0.550565 | -0.000033 |
| C                | -0.812469             | 0.794304  | -0.000015 |
| C                | -2.228448             | 0.901304  | -0.000002 |
| C                | -0.002617             | 1.983206  | 0.000001  |
| C                | 1.451793              | 1.80959   | -0.000007 |
| C                | 1.912931              | 0.45047   | -0.000019 |
| C                | 1.144684              | -0.717916 | -0.000033 |
| C                | 1.761159              | -2.115728 | 0.000021  |
| O                | 1.995415              | -2.645245 | -1.127076 |
| O                | 1.995409              | -2.645143 | 1.127168  |
| Cl               | 3.701344              | 0.252641  | -0.000014 |
| H                | -2.987302             | -2.41769  | -0.000024 |
| H                | -2.670151             | 1.892369  | 0.000016  |
| O                | -0.53836              | 3.167824  | 0.000022  |
| O                | 2.25813               | 2.82296   | 0.000003  |

| 2-Chloro-benzoate |           | Cartesian coordinates |           |  |
|-------------------|-----------|-----------------------|-----------|--|
| Atom              | x         | y                     | z         |  |
| C                 | -2.678858 | -0.079128             | 0.001161  |  |
| C                 | -2.197202 | -1.392379             | 0.002507  |  |
| C                 | -0.821817 | -1.630986             | 0.002238  |  |
| C                 | 0.105343  | -0.574863             | 0.001268  |  |
| C                 | -0.408244 | 0.726013              | -0.000357 |  |
| C                 | -1.779595 | 0.989492              | -0.000668 |  |
| H                 | -3.74653  | 0.117596              | 0.001009  |  |
| H                 | -2.890965 | -2.227861             | 0.003595  |  |
| H                 | -0.451197 | -2.652498             | 0.002737  |  |
| H                 | -2.135366 | 2.014356              | -0.00244  |  |
| C                 | 1.604526  | -0.88151              | 0.001341  |  |
| O                 | 2.144247  | -1.019134             | -1.130389 |  |
| O                 | 2.150526  | -0.991645             | 1.132923  |  |
| Cl                | 0.701232  | 2.111459              | -0.004124 |  |

| Phenolate | Cartesian coordinates |           |          |
|-----------|-----------------------|-----------|----------|
| Atom      | x                     | y         | z        |
| C         | 1.8276                | -0.000004 | 0        |
| C         | 1.104416              | 1.203731  | 0        |
| C         | -0.290525             | 1.211594  | 0        |
| C         | -1.063394             | -0.000034 | 0        |
| C         | -0.290546             | -1.211608 | 0        |
| C         | 1.104397              | -1.203713 | 0        |
| H         | 2.913906              | -0.000006 | 0        |
| H         | 1.639535              | 2.152514  | 0        |
| H         | -0.829889             | 2.157595  | 0        |
| H         | 1.639512              | -2.152502 | 0.000001 |
| O         | -2.360618             | 0.000024  | 0        |
| H         | -0.829805             | -2.157589 | 0        |

| 3-Fluoro-phenolate |           | Cartesian coordinates |           |  |
|--------------------|-----------|-----------------------|-----------|--|
| Atom               | x         | y                     | z         |  |
| C                  | 1.187515  | 1.104639              | 0         |  |
| C                  | -0.059098 | 1.756741              | 0.000001  |  |
| C                  | -1.258436 | 1.050655              | 0.000001  |  |
| C                  | -1.299475 | -0.388822             | 0         |  |
| C                  | -0.015295 | -1.039022             | -0.000001 |  |
| C                  | 1.144795  | -0.286438             | -0.000001 |  |
| H                  | 2.130237  | 1.639615              | 0.000001  |  |
| H                  | -0.081974 | 2.844568              | 0.000002  |  |
| H                  | -2.206376 | 1.584231              | 0.000002  |  |
| O                  | -2.40537  | -1.054391             | 0         |  |
| H                  | 0.037458  | -2.123987             | -0.000002 |  |
| F                  | 2.351509  | -0.966203             | -0.000002 |  |



| 4-Fluoro-phenolate |           | Cartesian coordinates |   |  |
|--------------------|-----------|-----------------------|---|--|
| Atom               | x         | y                     | z |  |
| C                  | 1.337006  | 0                     | 0 |  |
| C                  | 0.659749  | 1.213506              | 0 |  |
| C                  | -0.737404 | 1.211725              | 0 |  |
| C                  | -1.509164 | 0                     | 0 |  |
| C                  | -0.737404 | -1.211726             | 0 |  |
| C                  | 0.659749  | -1.213506             | 0 |  |
| H                  | 1.21829   | 2.146032              | 0 |  |
| H                  | -1.272685 | 2.158779              | 0 |  |
| O                  | -2.807024 | 0                     | 0 |  |
| H                  | -1.272685 | -2.158779             | 0 |  |
| H                  | 1.21829   | -2.146032             | 0 |  |
| F                  | 2.725532  | 0                     | 0 |  |

| 3-Bromo-phenolate | Cartesian coordinates |           |           |
|-------------------|-----------------------|-----------|-----------|
| Atom              | x                     | y         | z         |
| C                 | -0.237871             | 1.518856  | 0.000001  |
| C                 | -1.623104             | 1.756186  | 0.000002  |
| C                 | -2.551372             | 0.72067   | 0.000002  |
| C                 | -2.144705             | -0.657798 | 0.000001  |
| C                 | -0.72147              | -0.884919 | 0         |
| C                 | 0.164359              | 0.181597  | 0         |
| H                 | 0.478873              | 2.331029  | 0.000001  |
| H                 | -1.974204             | 2.786468  | 0.000003  |
| H                 | -3.617113             | 0.938182  | 0.000002  |
| O                 | -2.987933             | -1.634625 | 0         |
| H                 | -0.362906             | -1.909267 | -0.000001 |
| Br                | 2.058966              | -0.196485 | -0.000001 |

| 4-Bromo-phenolate | Cartesian coordinates |           |   |
|-------------------|-----------------------|-----------|---|
| Atom              | x                     | y         | z |
| C                 | 0.268395              | 0         | 0 |
| C                 | -0.429704             | 1.210803  | 0 |
| C                 | -1.822872             | 1.210512  | 0 |
| C                 | -2.596497             | 0         | 0 |
| C                 | -1.822872             | -1.210512 | 0 |
| C                 | -0.429704             | -1.210802 | 0 |
| H                 | 0.110697              | 2.153619  | 0 |
| H                 | -2.356761             | 2.158569  | 0 |
| O                 | -3.889358             | 0         | 0 |
| H                 | -2.35676              | -2.15857  | 0 |
| H                 | 0.110698              | -2.153618 | 0 |
| Br                | 2.188757              | 0         | 0 |

| 2-Chloro-phenolate |           | Cartesian coordinates |   |  |
|--------------------|-----------|-----------------------|---|--|
| Atom               | x         | y                     | z |  |
| C                  | 1.764137  | -1.3464               | 0 |  |
| C                  | 2.343658  | -0.067756             | 0 |  |
| C                  | 1.554263  | 1.078538              | 0 |  |
| C                  | 0.115745  | 1.046203              | 0 |  |
| C                  | -0.41589  | -0.291741             | 0 |  |
| C                  | 0.366726  | -1.442987             | 0 |  |
| H                  | 2.375439  | -2.24346              | 0 |  |
| H                  | 3.427248  | 0.033591              | 0 |  |
| H                  | 2.019403  | 2.06232               | 0 |  |
| H                  | -0.116393 | -2.416279             | 0 |  |
| O                  | -0.60721  | 2.10955               | 0 |  |
| Cl                 | -2.189403 | -0.480454             | 0 |  |

| 3-Chloro-phenolate | Cartesian coordinates |           |           |
|--------------------|-----------------------|-----------|-----------|
| Atom               | x                     | y         | z         |
| C                  | 0.490722              | 1.424419  | 0.000001  |
| C                  | -0.870174             | 1.776564  | 0.000001  |
| C                  | -1.879745             | 0.819342  | 0.000001  |
| C                  | -1.593654             | -0.590148 | 0         |
| C                  | -0.194091             | -0.932963 | -0.000001 |
| C                  | 0.777511              | 0.057218  | 0         |
| H                  | 1.276587              | 2.17046   | 0.000001  |
| H                  | -1.136557             | 2.831755  | 0.000002  |
| H                  | -2.923198             | 1.126582  | 0.000002  |
| O                  | -2.51593              | -1.492477 | 0         |
| H                  | 0.083407              | -1.982661 | -0.000001 |
| Cl                 | 2.496693              | -0.443112 | -0.000001 |

| 4-Chloro-phenolate | Cartesian coordinates |           |   |
|--------------------|-----------------------|-----------|---|
| Atom               | x                     | y         | z |
| C                  | -0.90922              | 0         | 0 |
| C                  | -0.213889             | -1.212185 | 0 |
| C                  | 1.180174              | -1.211383 | 0 |
| C                  | 1.954079              | 0         | 0 |
| C                  | 1.180174              | 1.211383  | 0 |
| C                  | -0.213889             | 1.212185  | 0 |
| H                  | -0.758241             | -2.152863 | 0 |
| H                  | 1.714119              | -2.159339 | 0 |
| O                  | 3.247676              | 0         | 0 |
| H                  | 1.714119              | 2.159339  | 0 |
| H                  | -0.758242             | 2.152863  | 0 |
| Cl                 | -2.691631             | 0         | 0 |

| 2,3-Dichloro-phenolate |           | Cartesian coordinates |           |  |
|------------------------|-----------|-----------------------|-----------|--|
| Atom                   | x         | y                     | z         |  |
| C                      | 0.192603  | 1.974958              | 0         |  |
| C                      | -1.197413 | 2.16127               | 0         |  |
| C                      | -2.075    | 1.085422              | 0         |  |
| C                      | -1.631401 | -0.280765             | 0.000001  |  |
| C                      | -0.191161 | -0.435914             | 0         |  |
| C                      | 0.671363  | 0.662083              | 0         |  |
| H                      | -1.591903 | 3.174711              | 0         |  |
| H                      | -3.149372 | 1.251722              | 0.000001  |  |
| O                      | -2.438488 | -1.27546              | 0.000001  |  |
| Cl                     | 0.437312  | -2.084131             | 0         |  |
| H                      | 0.882142  | 2.810505              | -0.000001 |  |
| Cl                     | 2.430516  | 0.434979              | -0.000001 |  |

| 2,4-Dichloro-phenolate |           | Cartesian coordinates |           |  |
|------------------------|-----------|-----------------------|-----------|--|
| Atom                   | x         | y                     | z         |  |
| C                      | -1.425232 | 0.042157              | 0         |  |
| C                      | -1.209977 | 1.423181              | 0.000001  |  |
| C                      | 0.090723  | 1.916388              | 0.000001  |  |
| C                      | 1.261578  | 1.080648              | 0         |  |
| C                      | 0.948597  | -0.325602             | 0         |  |
| C                      | -0.34491  | -0.840679             | 0         |  |
| H                      | -2.053069 | 2.107871              | 0.000001  |  |
| H                      | 0.255466  | 2.991042              | 0.000001  |  |
| O                      | 2.454857  | 1.551309              | 0         |  |
| H                      | -0.505403 | -1.913507             | -0.000001 |  |
| Cl                     | -3.080603 | -0.602211             | 0         |  |
| Cl                     | 2.300573  | -1.47852              | -0.000001 |  |



| 2,6-Dichloro-phenolate |           | Cartesian coordinates |           |  |
|------------------------|-----------|-----------------------|-----------|--|
| Atom                   | x         | y                     | z         |  |
| C                      | 0         | -2.280383             | 0         |  |
| C                      | 1.205063  | -1.567699             | 0         |  |
| C                      | 1.191941  | -0.177957             | 0.000001  |  |
| C                      | 0         | 0.634135              | 0         |  |
| C                      | -1.191941 | -0.177957             | -0.000001 |  |
| C                      | -1.205063 | -1.567699             | 0         |  |
| H                      | 2.155077  | -2.09362              | 0.000002  |  |
| O                      | 0         | 1.910338              | 0         |  |
| Cl                     | -2.748986 | 0.679268              | -0.000002 |  |
| H                      | 0         | -3.365222             | 0         |  |
| H                      | -2.155076 | -2.09362              | 0         |  |
| Cl                     | 2.748986  | 0.679268              | 0.000001  |  |

| 3,4-Dichloro-phenolate |           | Cartesian coordinates |   |  |
|------------------------|-----------|-----------------------|---|--|
| Atom                   | x         | y                     | z |  |
| C                      | -0.544088 | -0.714417             | 0 |  |
| C                      | 0.470902  | -1.68118              | 0 |  |
| C                      | 1.811941  | -1.319654             | 0 |  |
| C                      | 2.234701  | 0.054362              | 0 |  |
| C                      | 1.166611  | 1.018059              | 0 |  |
| C                      | -0.169561 | 0.635841              | 0 |  |
| H                      | 0.19278   | -2.731468             | 0 |  |
| O                      | 3.473519  | 0.405379              | 0 |  |
| H                      | 2.576244  | -2.092782             | 0 |  |
| H                      | 1.421724  | 2.07307               | 0 |  |
| Cl                     | -1.401163 | 1.911278              | 0 |  |
| Cl                     | -2.234245 | -1.231861             | 0 |  |
